# Supplementary material
Source: Elsevier journal article supplement (https://www.sciencedirect.com/science/article/pii/S2531137919300549)
Supplement: mmc3 [file S2531137919300549:mmc3.doc]

**Supplementary data**

Spleen response was assessed by the International Working Group-Myeloproliferative Neoplasms Research and Treatment(IWG-MRT) criteria: in patients with a baseline spleen length of 5–10 cm, response was defined as a spleen that had become non-palpable, and progressive disease was defined as a 100% increase from baseline in spleen length; in patients with a baseline spleen length of >10 cm, response was defined as a spleen length reduction of ≥50% from baseline, and progressive disease was defined as an increase of ≥50% from baseline in spleen length; stable disease was defined as a condition meeting neither criteria for response nor for progressive disease; patients with a baseline spleen length of ≤5 cm were not evaluable for response (Barosi et al. 2008). Changes in spleen length were assessed in patients at baseline and post-baseline. A 100% decrease from baseline was defined as a non-palpable spleen.

**Statistical analysis**

The results of the present analysis included only descriptive statistics from patients who started ruxolitinib treatment ≥1 year before data cutoff. Baseline and post-baseline analyses were performed for the assessment of changes in spleen length. Survival assessments were performed at the end of the 28-day follow-up period. The Kaplan-Meier method was used for the assessment of progression-free survival and overall survival.

Table 1 – Patient disposition.

| Disposition reason | N = 104  n (%) |
| --- | --- |
| **Patients treated** |  |
| Treatment received | 104 (100) |
| End of treatment | 104 (100) |
| **Primary reason for end of treatment** |  |
| Treatment duration completed as per protocol | 45 (43.3) |
| Death | 18 (17.3) |
| Adverse event(s) | 17 (16.3) |
| Disease progression | 13 (12.5) |
| Patient withdrew consent | 5 (4.8) |
| Protocol deviation | 4 (3.8) |
| Physician’s decision | 2 (1.9) |
| **Primary reason for study evaluation completion** |  |
| Follow-up phase completed as per protocol | 41 (39.4) |
| Death | 21 (20.2) |
| Adverse event(s) | 15 (14.4) |
| Disease progression | 12 (11.5) |
| Protocol deviation | 6 (5.8) |
| Patient withdrew consent | 5 (4.8) |
| Physician’s decision | 3 (2.9) |
| Lost to follow-up | 1 (1.0) |

**Table 2 –**SAEs regardless of study drug relationship (≥2% of patients).

| Primary system organ class  Preferred term | All patients (N = 104) | |
| --- | --- | --- |
|  | All grades, n (%) | Grades 3/4, n (%) |
| Total | 65 (62.5) | 58 (55.8) |
| Anemia | 5 (4.8) | 5 (4.8) |
| Cardiogenic shock | 3 (2.9) | 2 (1.9) |
| Ascites | 4 (3.9) | 3 (2.9) |
| Abdominal pain | 3 (2.9) | 2 (1.9) |
| Fatigue | 3 (2.9) | 3 (2.9) |
| Pneumonia | 22 (21.2) | 19 (18.3) |
| Sepsis | 8 (7.7) | 8 (7.7) |
| Urinary tract infection | 5 (4.8) | 5 (4.8) |
| Septic shock | 4 (3.9) | 4 (3.9) |
| Skin infection | 3 (2.9) | 3 (2.9) |
| Squamous cell carcinoma | 4 (3.9) | 1 (1.0) |
| Renal failure | 3 (2.9) | 2 (1.9) |
| Respiratory failure | 4 (3.9) | 4 (3.9) |
| Bronchospasm | 3 (2.9) | 3 (2.9) |
| Dyspnea | 3 (2.9) | 2 (1.9) |

SAE: serious adverse event.

**Figure captions**

**Figure 1, Supplementary data –**Mean total daily dose by starting dose.

bid: twice daily

**Figure 2, Supplementary data –**Mean % change in FACT-Lymphoma and FACIT-Fatigue scores over time.

Response was defined as the lower limit of the minimally important difference (FACT-Lymphoma TS, 6.5 points15; FACIT-Fatigue score, 3 points).16

FACIT: Functional Assessment of Chronic Illness Therapy; FACT: Functional Assessment of Cancer Therapy; TS: total score.
